# Supplementary material for: Pan-serotype Reduction in Progression of Streptococcus pneumoniae to Otitis Media After Rollout of Pneumococcal Conjugate Vaccines
Source: Oxford University Press journal article supplement (doi:10.1093/cid/cix673), 2017-07-28
Supplement: cix673_suppl_table_s1.pdf [file cix673_suppl_table_s1.pdf]

**PCV13 doses received among participants in the carriage and otitis media samples.**

|                                        | Bedouin children |               |                |                |                | Jewish children |               |                |                |               |
|----------------------------------------|------------------|---------------|----------------|----------------|----------------|-----------------|---------------|----------------|----------------|---------------|
|                                        | 0-1m             | 2-3m          | 4-11m          | 12-23m         | 24-35m         | 0-1m            | 2-3m          | 4-11m          | 12-23m         | 24-35m        |
| <b>Carriage sample<sup>1</sup></b>     | <b>N = 86</b>    | <b>N = 70</b> | <b>N = 234</b> | <b>N = 184</b> | <b>N = 111</b> | <b>N = 33</b>   | <b>N = 51</b> | <b>N = 168</b> | <b>N = 205</b> | <b>N = 96</b> |
| 0 doses                                | 86 (100)         | 25 (35.7)     | 9 (3.8)        | 4 (2.2)        | 1 (0.9)        | 33 (100)        | 10 (19.6)     | 4 (2.4)        | 4 (1.8)        | 2 (2.1)       |
| 1 dose                                 | 0                | 45 (64.3)     | 44 (18.8)      | 7 (3.8)        | 2 (1.8)        | 0               | 41 (80.4)     | 16 (9.5)       | 3 (1.4)        | 0             |
| 2 doses                                | 0                | 0             | 180 (76.9)     | 32 (17.4)      | 10 (9.0)       | 0               | 0             | 148 (88.1)     | 52 (24.0)      | 6 (6.2)       |
| 3 doses                                | 0                | 0             | 1 (0.4)        | 140 (76.1)     | 96 (86.5)      | 0               | 0             | 0              | 157 (72.4)     | 88 (91.7)     |
| 4 doses                                | 0                | 0             | 0              | 1 (0.5)        | 2 (1.8)        | 0               | 0             | 0              | 1 (0.5)        | 0             |
| <b>Otitis media sample<sup>1</sup></b> | <b>N = 16</b>    | <b>N = 22</b> | <b>N = 105</b> | <b>N = 101</b> | <b>N = 43</b>  | <b>N = 17</b>   | <b>N = 16</b> | <b>N = 189</b> | <b>N = 272</b> | <b>N = 72</b> |
| 0 doses                                | 16 (100)         | 11 (50.0)     | 4 (3.8)        | 2 (2.0)        | 0              | 17 (100)        | 5 (31.2)      | 5 (2.6)        | 10 (3.7)       | 1 (1.4)       |
| 1 dose                                 | 0                | 11 (50.0)     | 16 (15.2)      | 2 (2.0)        | 1 (2.3)        | 0               | 11 (68.8)     | 11 (5.8)       | 6 (2.2)        | 4 (5.6)       |
| 2 doses                                | 0                | 0             | 84 (80.0)      | 18 (17.8)      | 3 (7.0)        | 0               | 0             | 168 (88.9)     | 79 (29.0)      | 5 (6.9)       |
| 3 doses                                | 0                | 0             | 1 (1.0)        | 79 (78.2)      | 35 (81.4)      | 0               | 0             | 5 (2.6)        | 176 (64.7)     | 62 (86.1)     |
| 4 doses                                | 0                | 0             | 0              | 0              | 4 (9.3)        | 0               | 0             | 0 (0)          | 1 (0.4)        | 0             |

<sup>1</sup>Israel has a two-dose-plus-booster schedule with a primary series around ages 2 and 4 months and booster dose around 12 months. PCV13 was in routine use for all doses among children included in the samples.
