# Supplementary material for: Pan-serotype Reduction in Progression of Streptococcus pneumoniae to Otitis Media After Rollout of Pneumococcal Conjugate Vaccines
Source: Oxford University Press journal article supplement (doi:10.1093/cid/cix673), 2017-07-28
Supplement: cix673_suppl_table_s2.pdf [file cix673_suppl_table_s2.pdf]

**Table S2: Serotype coverage for phenotypic measurements.**

| Attribute             | Serotypes                                                                                                                                                                                                                                        |
|-----------------------|--------------------------------------------------------------------------------------------------------------------------------------------------------------------------------------------------------------------------------------------------|
| Neutrophil resistance | 1, 4, 5, 6A/C, 6B, 7F, 9N, 9V, 11A, 14, 18C, 19A, 19F, 23F                                                                                                                                                                                       |
| Encapsulation         | 1, 4, 5, 6A/C, 6B, 7F, 9N, 9V, 11A, 14, 18C, 19A, 19F, 23F, 35B                                                                                                                                                                                  |
| Metabolic burden      | 1, 2, 3, 4, 5, 6A/C, 6B, 7A, 7B, 7F, 8, 9A, 9L, 9N, 9V, 10A, 10F, 11A, 11B, 11C, 11F, 12A, 12F, 13, 14, 15A, 15B, 15C, 16F, 17A, 17F, 18A, 18B, 18C, 18F, 19A, 19B, 19C, 19F, 20, 22F, 23F, 27, 29, 31, 32A, 32F, 33B, 33F, 34, 35A, 35B, 37, 43 |
| Invasiveness          | 1, 3, 4, 5, 6A/C, 6B, 7F, 8, 9A, 9N, 9V, 10A, 11A, 12F, 13, 14, 15A, 15B, 15C, 16F, 17F, 18B, 18C, 19A, 19F, 20, 21, 22F, 23A, 23B, 23F, 31, 33F, 35F, 37, 38                                                                                    |
| Surface charge        | 1, 2, 3, 4, 5, 6A/C, 6B, 7A, 7B, 7F, 8, 9A, 9L, 9N, 9V, 10A, 10F, 11A, 11C, 11F, 12A, 12F, 13, 14, 15A, 15B, 15C, 16F, 17A, 17F, 18A, 18B, 18C, 18F, 19A, 19B, 19C, 19F, 20, 22F, 23F, 27, 29, 31, 32A, 32F, 33B, 33F, 34, 35A, 35B, 37, 43      |
| IPD CFR <sup>1</sup>  | 1, 2, 3, 4, 5, 6A/C, 6B, 7F, 8, 9A, 9N, 9V, 10A, 11A, 12A, 12F, 13, 14, 15A, 15B, 15C, 16F, 17F, 18C, 19A, 19F, 20, 22F, 23A, 23F, 24F, 31, 33F, 34, 35B, 35F, 38                                                                                |

<sup>1</sup>IPD CFR: serotype-specific 30-day case-fatality ratio during invasive pneumococcal disease episodes
