# Supplementary material for: Pan-serotype Reduction in Progression of Streptococcus pneumoniae to Otitis Media After Rollout of Pneumococcal Conjugate Vaccines
Source: Oxford University Press journal article supplement (doi:10.1093/cid/cix673), 2017-07-28
Supplement: cix673_suppl_table_s3.pdf [file cix673_suppl_table_s3.pdf]

**Table S3: Sensitivity analysis: changes in pneumococcal carriage prevalence, calculated without excluding children experiencing respiratory illness from carriage sample.**

| Age          | Ethnicity | All serotypes              |                             |                          | Vaccine-targeted serotype  |                             |                          | Non-vaccine serotype       |                             |                          |
|--------------|-----------|----------------------------|-----------------------------|--------------------------|----------------------------|-----------------------------|--------------------------|----------------------------|-----------------------------|--------------------------|
|              |           | Pre-rollout <sup>1,2</sup> | Post-rollout <sup>1,2</sup> | RR <sup>2</sup>          | Pre-rollout <sup>1,2</sup> | Post-rollout <sup>1,2</sup> | RR <sup>2</sup>          | Pre-rollout <sup>1,2</sup> | Post-rollout <sup>1,2</sup> | RR <sup>2</sup>          |
| 0-11 months  | Bedouin   | 0.75 (0.66, 0.87)          | 0.46 (0.42, 0.50)           | <b>0.61 (0.52, 0.72)</b> | 0.39 (0.33, 0.44)          | 0.09 (0.08, 0.09)           | <b>0.22 (0.19, 0.26)</b> | 0.37 (0.32, 0.43)          | 0.37 (0.34, 0.41)           | 1.01 (0.86, 1.19)        |
|              | Jewish    | 0.40 (0.33, 0.48)          | 0.38 (0.35, 0.43)           | 0.96 (0.78, 1.19)        | 0.18 (0.15, 0.21)          | 0.04 (0.04, 0.05)           | <b>0.25 (0.20, 0.30)</b> | 0.22 (0.19, 0.27)          | 0.34 (0.31, 0.38)           | <b>1.52 (1.23, 1.87)</b> |
| 12-35 months | Bedouin   | 0.79 (0.74, 0.85)          | 0.45 (0.41, 0.49)           | <b>0.57 (0.50, 0.64)</b> | 0.50 (0.47, 0.54)          | 0.07 (0.06, 0.07)           | <b>0.13 (0.12, 0.15)</b> | 0.29 (0.27, 0.31)          | 0.38 (0.35, 0.42)           | <b>1.31 (1.16, 1.48)</b> |
|              | Jewish    | 0.49 (0.42, 0.56)          | 0.43 (0.39, 0.48)           | 0.89 (0.75, 1.06)        | 0.32 (0.28, 0.37)          | 0.03 (0.03, 0.03)           | <b>0.10 (0.08, 0.12)</b> | 0.16 (0.14, 0.19)          | 0.40 (0.36, 0.44)           | <b>2.47 (2.07, 2.94)</b> |

<sup>1</sup>Carriage prevalence is measured as a proportion and standardized for ages 6 and 24 months within the <12 and 12-35 month age groups, respectively. The pre-PCV7 and PCV13 periods correspond to July 2004-June 2008 and July 2013-June 2016, respectively.

<sup>2</sup>All estimates (risk ratio for prevalence) are presented as mean (95% credible interval).
