# Supplementary material for: Pan-serotype Reduction in Progression of Streptococcus pneumoniae to Otitis Media After Rollout of Pneumococcal Conjugate Vaccines
Source: Oxford University Press journal article supplement (doi:10.1093/cid/cix673), 2017-07-28
Supplement: cix673_suppl_table_s4.pdf [file cix673_suppl_table_s4.pdf]

**Table S4: Sensitivity analysis: reduction in otitis media progression rate after vaccine introduction, calculated without excluding children experiencing respiratory illness from carriage sample.**

| Age group    | Ethnicity        | Vaccine-targeted serotypes |                          |                              | Non-vaccine serotypes    |
|--------------|------------------|----------------------------|--------------------------|------------------------------|--------------------------|
|              |                  | PCV7 serotypes             | +6 PCV13 serotypes       | All PCV7 and PCV13 serotypes |                          |
| 0-11 months  | Bedouin children | <b>0.91 (0.33, 0.99)</b>   | <b>0.91 (0.43, 0.98)</b> | <b>0.92 (0.77, 0.97)</b>     | <b>0.76 (0.61, 0.86)</b> |
|              | Jewish children  | <b>0.85 (0.00, 0.97)</b>   | 0.79 (-1.34, 0.97)       | <b>0.84 (0.51, 0.94)</b>     | <b>0.55 (0.23, 0.75)</b> |
| 12-35 months | Bedouin children | 0.28 (-2.38, 0.81)         | 0.40 (-1.84, 0.89)       | 0.34 (-0.46, 0.69)           | 0.34 (-0.01, 0.57)       |
|              | Jewish children  | 0.45 (-2.75, 0.91)         | 0.71 (-0.95, 0.98)       | 0.60 (-0.08, 0.86)           | 0.07 (-0.61, 0.42)       |

Effects of vaccine introduction on progression rate presented as median (95% credible interval) and pooled from serotype-level measurements using a Bayesian random effects model.
