# Supplementary material for: Pan-serotype Reduction in Progression of Streptococcus pneumoniae to Otitis Media After Rollout of Pneumococcal Conjugate Vaccines
Source: Oxford University Press journal article supplement (doi:10.1093/cid/cix673), 2017-07-28
Supplement: cix673_suppl_table_s5.pdf [file cix673_suppl_table_s5.pdf]

**Table S5. Carriage prevalence, OM incidence, and progression rate by season.**

|                              |                | Rate (95% CrI) <sup>†</sup> |                    | Reduction in progression (95% CrI)                       |
|------------------------------|----------------|-----------------------------|--------------------|----------------------------------------------------------|
|                              |                | Pre-PCV7 rollout            | Post-PCV13 rollout | $1 - \text{Rate}_{\text{Pre}}/\text{Rate}_{\text{Post}}$ |
| <b>PCV7/13 serotypes</b>     |                |                             |                    |                                                          |
| Bedouin children             |                |                             |                    |                                                          |
| 0-11m                        |                |                             |                    |                                                          |
|                              | April-November | 20.9 (16.5, 26.6)           | 3.3 (1.8, 5.8)     | <b>0.84 (0.71, 0.92)</b>                                 |
|                              | December-March | 49.6 (38.1, 65.1)           | 5.8 (3.1, 10.3)    | <b>0.88 (0.78, 0.94)</b>                                 |
| 12-35m                       |                |                             |                    |                                                          |
|                              | April-November | 3.3 (2.8, 3.8)              | 3.2 (1.8, 5.3)     | 0.04 (-0.65, 0.46)                                       |
|                              | December-March | 6.1 (5.1, 7.3)              | 6.7 (3.7, 11.7)    | -0.10 (-0.99, 0.40)                                      |
| Jewish children              |                |                             |                    |                                                          |
| 0-11m                        |                |                             |                    |                                                          |
|                              | April-November | 48.7 (34.9, 68.8)           | 16.8 (9.1, 31.0)   | <b>0.66 (0.31, 0.83)</b>                                 |
|                              | December-March | 97.3 (67.4, 142.3)          | 23.0 (12.0, 44.4)  | <b>0.76 (0.50, 0.89)</b>                                 |
| 12-35m                       |                |                             |                    |                                                          |
|                              | April-November | 14.8 (11.8, 18.5)           | 6.9 (3.8, 12.4)    | <b>0.53 (0.13, 0.75)</b>                                 |
|                              | December-March | 30.2 (22.8, 40.2)           | 17.4 (9.4, 31.8)   | 0.43 (-0.12, 0.71)                                       |
| <b>Non-vaccine serotypes</b> |                |                             |                    |                                                          |
| Bedouin children             |                |                             |                    |                                                          |
| 0-11m                        |                |                             |                    |                                                          |
|                              | April-November | 6.5 (5.0, 8.4)              | 2.6 (2.0, 3.3)     | <b>0.60 (0.44, 0.72)</b>                                 |
|                              | December-March | 15.4 (11.6, 20.4)           | 4.5 (3.3, 6.1)     | <b>0.71 (0.56, 0.81)</b>                                 |
| 12-35m                       |                |                             |                    |                                                          |
|                              | April-November | 2.7 (2.2, 3.3)              | 2.2 (1.8, 2.8)     | 0.18 (-0.11, 0.40)                                       |
|                              | December-March | 5.0 (4.0, 6.2)              | 4.7 (3.5, 6.3)     | 0.06 (-0.37, 0.35)                                       |
| Jewish children              |                |                             |                    |                                                          |
| 0-11m                        |                |                             |                    |                                                          |
|                              | April-November | 8.2 (6.0, 11.1)             | 8.3 (6.3, 11.0)    | -0.02 (-0.55, 0.33)                                      |
|                              | December-March | 16.3 (11.5, 23.1)           | 11.4 (8.0, 16.3)   | 0.30 (-0.15, 0.57)                                       |
| 12-35m                       |                |                             |                    |                                                          |
|                              | April-November | 4.2 (3.1, 5.6)              | 3.2 (2.6, 4.0)     | 0.23 (-0.10, 0.47)                                       |
|                              | December-March | 8.6 (6.1, 12.0)             | 8.1 (6.1, 10.6)    | 0.06 (-0.46, 0.39)                                       |

<sup>†</sup>Due to lower number of observations within seasonal strata, we calculate rates within seasons pooling serotype-specific frequencies in carriage and disease according to vaccine types and non-vaccine type (in contrast to the serotype-specific estimates of the main analysis). Prior to PCV7 rollout, the relative rates of progression for in December-March (ref. April-November) were 2.37 (95%CrI: 1.77, 3.19) and 2.00 (1.37, 2.92) among Bedouin and Jewish children ages 0-11m, respectively, and 1.84 (1.54, 2.21) and 2.04 (1.49, 2.81) among Bedouin and Jewish children ages 12-35m; after rollout, relative rates in December-March (ref. April-November) were 1.74 (1.09, 2.78) and 1.37 (0.86, 2.18) among Bedouin and Jewish children ages 0-11m, and 2.13 (1.41, 3.19) and 2.51 (1.73, 3.65) among Bedouin and Jewish children ages 12-35m.
