# Supplementary material for: Pan-serotype Reduction in Progression of Streptococcus pneumoniae to Otitis Media After Rollout of Pneumococcal Conjugate Vaccines
Source: Oxford University Press journal article supplement (doi:10.1093/cid/cix673), 2017-07-28
Supplement: cix673_suppl_table_s6.pdf [file cix673_suppl_table_s6.pdf]

**Table S6: Progression rate of non-vaccine serotypes.**

| Serotype          | OM incidence per year per 1000 carriers (log <sub>10</sub> scale) (95% CrI) |                            |                         |                             |                            |                         |
|-------------------|-----------------------------------------------------------------------------|----------------------------|-------------------------|-----------------------------|----------------------------|-------------------------|
|                   | Bedouin children                                                            |                            |                         | Jewish children             |                            |                         |
|                   | Before rollout <sup>1</sup>                                                 | After rollout <sup>1</sup> | Rate ratio <sup>1</sup> | Before rollout <sup>1</sup> | After rollout <sup>1</sup> | Rate ratio <sup>1</sup> |
| <b>Ages 0-11m</b> |                                                                             |                            |                         |                             |                            |                         |
| 2                 | -0.57 (-1.34, 0.88)                                                         | -1.58 (-2.7, -0.05)        | -1.04 (-2.81, 0.69)     | -1.1 (-1.94, 0.35)          | -1.78 (-3.37, -0.19)       | -0.73 (-2.81, 1.11)     |
| 6C                | -1.91 (-2.4, -1.41)                                                         | -3.06 (-4.54, -2.24)       | -1.17 (-2.69, -0.18)    | -1.8 (-2.63, -0.87)         | -1.97 (-2.59, -1.4)        | -0.18 (-1.29, 0.83)     |
| 6D                | -2.57 (-4.05, -1.6)                                                         | -2.68 (-4.17, -1.76)       | -0.12 (-1.87, 1.62)     | -2.34 (-3.05, -1.74)        | -2.12 (-3.04, -1.37)       | 0.22 (-0.87, 1.25)      |
| 7B                | -1.64 (-2.39, -0.73)                                                        | -1.97 (-3.55, -0.35)       | -0.34 (-2.13, 1.43)     | -1.35 (-1.98, -0.47)        | -2.12 (-3.04, -1.37)       | -0.8 (-2.04, 0.22)      |
| 7C                | -1.91 (-2.44, -1.36)                                                        | -2.34 (-3.87, -1.22)       | -0.45 (-2.05, 0.81)     | -2.01 (-2.99, -1.03)        | -1.78 (-3.39, -0.21)       | 0.23 (-1.63, 2.08)      |
| 8                 | -2.37 (-3.89, -1.26)                                                        | -2.69 (-4.17, -1.76)       | -0.33 (-2.14, 1.45)     | -2 (-3.59, -0.41)           | -1.78 (-3.36, -0.19)       | 0.22 (-2.02, 2.43)      |
| 9A                | -1.74 (-2.14, -1.3)                                                         | -1.96 (-3.56, -0.36)       | -0.23 (-1.89, 1.43)     | -1.42 (-2.39, 0.05)         | -1.79 (-3.38, -0.21)       | -0.4 (-2.53, 1.48)      |
| 9L                | -0.7 (-1.24, 0.14)                                                          | -2.1 (-2.86, -1.39)        | -1.42 (-2.52, -0.5)     | -0.46 (-1.21, 1)            | -1.06 (-1.97, 0.4)         | -0.62 (-2.28, 1.03)     |
| 9N                | -2.56 (-4.05, -1.6)                                                         | -2.79 (-4.26, -1.9)        | -0.23 (-1.95, 1.48)     | -1.63 (-2.74, -0.11)        | -1.52 (-2.07, -0.91)       | 0.1 (-1.49, 1.37)       |
| 10A               | -1.98 (-2.75, -1.22)                                                        | -3.11 (-4.57, -2.28)       | -1.15 (-2.75, 0.01)     | -2.22 (-3.16, -1.41)        | -2.69 (-4.16, -1.85)       | -0.5 (-2.12, 0.79)      |
| 10B               | -2.13 (-2.55, -1.73)                                                        | -3.23 (-4.68, -2.42)       | -1.11 (-2.6, -0.18)     | -1.44 (-2.4, 0.04)          | -2.23 (-3.14, -1.53)       | -0.83 (-2.51, 0.42)     |
| 10F               | -1.54 (-2.24, -0.65)                                                        | -2.55 (-4.04, -1.56)       | -1.05 (-2.73, 0.21)     | -1.67 (-2.41, -0.75)        | -1.78 (-2.44, -1.12)       | -0.12 (-1.23, 0.87)     |
| 11                | -1.98 (-3.56, -0.39)                                                        | -2.35 (-3.86, -1.22)       | -0.39 (-2.52, 1.57)     | -2.01 (-3.61, -0.43)        | -1.78 (-3.36, -0.2)        | 0.23 (-1.98, 2.44)      |
| 11A               | -1.35 (-1.59, -1.09)                                                        | -3.06 (-4.52, -2.23)       | -1.72 (-3.2, -0.85)     | -0.88 (-1.24, -0.42)        | -1.68 (-2.28, -1.04)       | -0.8 (-1.55, -0.06)     |
| 11D               | -2.56 (-4.04, -1.6)                                                         | -1.96 (-3.56, -0.34)       | 0.64 (-1.26, 2.76)      | -1.63 (-2.72, -0.12)        | -1.78 (-3.36, -0.19)       | -0.18 (-2.3, 1.78)      |
| 12A               | -1.15 (-2.02, 0.32)                                                         | -1.96 (-2.96, -0.96)       | -0.84 (-2.58, 0.51)     | -1.81 (-2.63, -0.88)        | -1.2 (-2.18, 0.3)          | 0.62 (-0.74, 2.3)       |
| 12F               | -1.98 (-3.57, -0.39)                                                        | -1.96 (-2.75, -1.17)       | 0.02 (-1.75, 1.78)      | -2.4 (-3.92, -1.29)         | -1.98 (-2.92, -1.16)       | 0.42 (-1.04, 2.13)      |
| 13                | -2.24 (-2.85, -1.71)                                                        | -2.72 (-3.62, -2.08)       | -0.49 (-1.51, 0.4)      | -1.92 (-2.46, -1.37)        | -2.31 (-3.21, -1.64)       | -0.4 (-1.43, 0.48)      |
| 15A               | -1.48 (-1.76, -1.18)                                                        | -2.68 (-4.17, -1.76)       | -1.21 (-2.71, -0.23)    | -0.67 (-1.11, -0.03)        | -1.78 (-2.76, -0.79)       | -1.13 (-2.28, -0.03)    |
| 15B/C             | -1.74 (-2.03, -1.43)                                                        | -2.68 (-4.18, -1.76)       | -0.95 (-2.47, 0.02)     | -1.68 (-2.02, -1.31)        | -1.78 (-3.38, -0.18)       | -0.11 (-1.74, 1.53)     |
| 15F               | -2.12 (-2.86, -1.44)                                                        | -1.96 (-3.56, -0.34)       | 0.16 (-1.56, 1.93)      | -2.01 (-3.61, -0.44)        | -1.78 (-3.38, -0.17)       | 0.23 (-1.98, 2.46)      |
| 16F               | -2.79 (-3.66, -2.19)                                                        | -3.29 (-4.75, -2.49)       | -0.5 (-2.06, 0.68)      | -2.37 (-3.29, -1.63)        | -2.44 (-3.33, -1.8)        | -0.09 (-1.22, 1.03)     |
| 17F               | -1.49 (-1.75, -1.2)                                                         | -2.79 (-4.26, -1.9)        | -1.31 (-2.8, -0.37)     | -0.93 (-1.32, -0.41)        | -2.16 (-3.68, -1.05)       | -1.25 (-2.83, -0.05)    |
| 18A               | -1.4 (-2.36, 0.06)                                                          | -3.01 (-4.46, -2.18)       | -1.67 (-3.64, -0.32)    | -2.01 (-3.59, -0.41)        | -2.51 (-3.97, -1.6)        | -0.53 (-2.64, 1.31)     |
| 18B               | -1.63 (-2.73, -0.18)                                                        | -2.8 (-4.27, -1.9)         | -1.22 (-3.19, 0.27)     | -2 (-3.61, -0.41)           | -1.78 (-3.38, -0.18)       | 0.22 (-2, 2.45)         |
| 19B               | -2.71 (-4.16, -1.81)                                                        | -1.97 (-3.56, -0.38)       | 0.78 (-1.07, 2.88)      | -2.05 (-3.63, -0.53)        | -1.79 (-3.37, -0.19)       | 0.27 (-1.91, 2.48)      |
| 20                | -2.08 (-2.71, -1.49)                                                        | -3.01 (-4.45, -2.17)       | -0.94 (-2.47, 0.13)     | -2.02 (-3.62, -0.45)        | -2.31 (-3.2, -1.63)        | -0.31 (-2.08, 1.44)     |
| 21                | -1.98 (-2.5, -1.47)                                                         | -2.5 (-3.1, -2)            | -0.52 (-1.3, 0.2)       | -1.83 (-2.39, -1.22)        | -2.03 (-2.76, -1.39)       | -0.2 (-1.14, 0.65)      |
| 22A               | -1.65 (-2.39, -0.76)                                                        | -1.96 (-3.55, -0.36)       | -0.32 (-2.11, 1.44)     | -1.63 (-2.74, -0.11)        | -1.78 (-3.37, -0.18)       | -0.18 (-2.33, 1.77)     |
| 22F               | -1.43 (-1.84, -0.93)                                                        | -2.34 (-3.88, -1.21)       | -0.93 (-2.52, 0.28)     | -1.8 (-2.28, -1.27)         | -1.79 (-3.39, -0.18)       | 0.01 (-1.67, 1.67)      |
| 23A               | -2.75 (-3.62, -2.14)                                                        | -3.37 (-4.83, -2.58)       | -0.63 (-2.18, 0.55)     | -2.72 (-3.39, -2.21)        | -2.88 (-4.34, -2.07)       | -0.16 (-1.69, 0.89)     |
| 23B               | -2.08 (-2.51, -1.67)                                                        | -2.81 (-3.69, -2.18)       | -0.73 (-1.69, 0.04)     | -1.68 (-2.42, -0.79)        | -2.88 (-4.34, -2.07)       | -1.24 (-2.88, -0.08)    |
| 24A               | -1.26 (-2.17, 0.21)                                                         | -2.34 (-3.87, -1.22)       | -1.14 (-3.17, 0.37)     | -2 (-3.6, -0.4)             | -1.78 (-3.38, -0.18)       | 0.22 (-2.01, 2.45)      |
| 24B               | -1.99 (-3.57, -0.42)                                                        | -2.35 (-3.86, -1.22)       | -0.38 (-2.51, 1.57)     | -2.4 (-3.89, -1.31)         | -1.78 (-3.37, -0.19)       | 0.65 (-1.3, 2.77)       |
| 24F               | -2.32 (-3.24, -1.59)                                                        | -2.35 (-3.87, -1.22)       | -0.02 (-1.69, 1.42)     | -1.63 (-2.74, -0.11)        | -2.37 (-3.85, -1.39)       | -0.79 (-2.84, 0.75)     |
| 27                | -1.6 (-2.71, -0.09)                                                         | -1.96 (-3.56, -0.35)       | -0.39 (-2.52, 1.57)     | -2.01 (-3.6, -0.42)         | -1.78 (-3.36, -0.19)       | 0.23 (-1.98, 2.43)      |
| 28F               | -1.88 (-2.47, -1.25)                                                        | -2.55 (-4.05, -1.56)       | -0.69 (-2.27, 0.48)     | -1.62 (-2.74, -0.11)        | -1.98 (-2.92, -1.16)       | -0.38 (-2.12, 1.02)     |
| 28A               | -1.6 (-2.71, -0.08)                                                         | -1.96 (-3.58, -0.36)       | -0.39 (-2.56, 1.58)     | -2 (-3.6, -0.4)             | -1.78 (-3.36, -0.18)       | 0.22 (-2, 2.45)         |
| 29                | -2.37 (-3.86, -1.25)                                                        | -1.96 (-3.56, -0.36)       | 0.43 (-1.52, 2.57)      | -2.39 (-3.89, -1.28)        | -1.78 (-3.37, -0.18)       | 0.63 (-1.31, 2.78)      |
| 31                | -2.56 (-4.04, -1.6)                                                         | -3.18 (-4.66, -2.38)       | -0.63 (-2.35, 1.04)     | -1.19 (-2.05, 0.26)         | -2.2 (-2.8, -1.7)          | -1.04 (-2.57, -0.01)    |
| 33A               | -2.12 (-2.85, -1.44)                                                        | -2.41 (-3.33, -1.68)       | -0.29 (-1.42, 0.74)     | -1.45 (-2.41, 0.01)         | -1.2 (-2.17, 0.3)          | 0.25 (-1.47, 2.01)      |
| 33B               | -1.58 (-2.16, -0.88)                                                        | -2.35 (-3.86, -1.22)       | -0.78 (-2.41, 0.5)      | -1.18 (-2.04, 0.3)          | -1.4 (-2.52, 0.11)         | -0.23 (-2.03, 1.51)     |
| 33F               | -2.13 (-2.86, -1.46)                                                        | -2.55 (-4.04, -1.56)       | -0.43 (-2.03, 0.82)     | -2.01 (-2.78, -1.25)        | -1.98 (-2.92, -1.15)       | 0.02 (-1.17, 1.15)      |
| 34                | -1.44 (-1.97, -0.77)                                                        | -3.23 (-4.69, -2.42)       | -1.82 (-3.38, -0.82)    | -1.1 (-1.94, 0.36)          | -2.38 (-3.07, -1.85)       | -1.32 (-2.89, -0.27)    |

|     |                      |                      |                      |                      |                      |                     |
|-----|----------------------|----------------------|----------------------|----------------------|----------------------|---------------------|
| 35A | -1.26 (-2.16, 0.21)  | -2.69 (-4.18, -1.76) | -1.5 (-3.51, -0.11)  | -1.63 (-2.74, -0.13) | -2.37 (-3.85, -1.39) | -0.8 (-2.82, 0.74)  |
| 35B | -1.35 (-1.6, -1.07)  | -2.56 (-3.27, -2.01) | -1.22 (-1.97, -0.61) | -0.93 (-1.33, -0.4)  | -1.58 (-2.41, -0.63) | -0.65 (-1.63, 0.38) |
| 35C | -1.65 (-2.39, -0.74) | -2.34 (-3.87, -1.22) | -0.73 (-2.46, 0.65)  | -2.03 (-3.63, -0.49) | -1.78 (-3.38, -0.2)  | 0.25 (-1.92, 2.47)  |
| 35F | -1.47 (-1.85, -1.02) | -2.35 (-3.87, -1.22) | -0.9 (-2.46, 0.31)   | -1.17 (-1.76, -0.31) | -2.16 (-3.68, -1.05) | -1.03 (-2.72, 0.27) |
| 37  | -1.42 (-1.95, -0.74) | -1.96 (-3.55, -0.36) | -0.56 (-2.26, 1.13)  | -1.03 (-1.85, 0.42)  | -1.78 (-3.38, -0.19) | -0.81 (-2.89, 1.01) |
| 38  | -2.64 (-3.53, -2.01) | -2.49 (-3.41, -1.79) | 0.15 (-0.95, 1.27)   | -2.45 (-3.36, -1.76) | -2.17 (-3.68, -1.05) | 0.29 (-1.37, 1.71)  |
| 46  | -1.6 (-2.71, -0.1)   | -1.96 (-3.56, -0.36) | -0.39 (-2.52, 1.57)  | -2.01 (-3.59, -0.43) | -1.78 (-3.38, -0.21) | 0.22 (-1.98, 2.44)  |

**Ages 12-35m**

|       |                      |                      |                     |                      |                      |                     |
|-------|----------------------|----------------------|---------------------|----------------------|----------------------|---------------------|
| 2     | -1.26 (-1.89, -0.39) | -2.08 (-3.67, -0.5)  | 2.67 (-2.64, 0.86)  | -1.13 (-1.94, 0.34)  | -1.96 (-3.53, -0.35) | 2.45 (-2.96, 0.97)  |
| 6C    | -2.94 (-3.79, -2.37) | -3.13 (-4.57, -2.3)  | -1.45 (-1.72, 1)    | -1.58 (-2.55, -0.11) | -2.52 (-3.2, -1.98)  | -2.39 (-2.55, 0.19) |
| 6D    | -2.32 (-3.01, -1.74) | -2.67 (-4.17, -1.69) | 1.7 (-1.95, 0.85)   | -2.16 (-3.16, -1.19) | -2.38 (-2.96, -1.88) | 0.49 (-1.35, 0.88)  |
| 7B    | -2.16 (-2.88, -1.53) | -2.47 (-3.99, -1.35) | -0.91 (-1.95, 1.02) | -1.96 (-2.78, -1.02) | -2.3 (-3.22, -1.55)  | 0.21 (-1.63, 0.78)  |
| 7C    | -2.12 (-3.05, -1.3)  | -2.09 (-3.69, -0.48) | -2.64 (-1.75, 1.88) | -2.17 (-3.15, -1.18) | -1.95 (-3.55, -0.37) | -2 (-1.64, 2.05)    |
| 8     | -2.64 (-4.11, -1.73) | -2.53 (-3.44, -1.81) | 0.46 (-1.16, 1.73)  | -1.78 (-2.9, -0.29)  | -2.34 (-3.86, -1.23) | 2.43 (-2.66, 1.01)  |
| 9A    | -2.31 (-3.01, -1.74) | -2.47 (-3.99, -1.35) | 0.71 (-1.76, 1.16)  | -2.17 (-2.94, -1.4)  | -1.97 (-3.54, -0.36) | 1.17 (-1.54, 1.96)  |
| 9L    | -2.11 (-2.72, -1.55) | -2.08 (-3.07, -1.09) | -1.13 (-1.11, 1.19) | -0.81 (-1.59, 0.65)  | -1.37 (-2.35, 0.12)  | -0.65 (-2.28, 1.1)  |
| 9N    | -2.66 (-3.32, -2.16) | -1.7 (-2.81, -0.17)  | 2.8 (-0.27, 2.61)   | -1.78 (-2.9, -0.29)  | -2.23 (-2.76, -1.75) | 3.27 (-2.02, 0.77)  |
| 10A   | -2.75 (-4.23, -1.89) | -2.81 (-4.29, -1.89) | -0.06 (-1.76, 1.66) | -2.49 (-3.2, -1.89)  | -2.33 (-2.93, -1.83) | 0.16 (-0.68, 1.02)  |
| 10B   | -2.02 (-2.65, -1.43) | -2.54 (-3.25, -1.97) | -1.76 (-1.44, 0.33) | -1.96 (-2.78, -1.03) | -2.68 (-4.16, -1.77) | -0.68 (-2.44, 0.52) |
| 10F   | -2.44 (-3.34, -1.78) | -3.07 (-4.53, -2.24) | 1.66 (-2.22, 0.61)  | -1.78 (-2.89, -0.27) | -1.56 (-2.14, -0.86) | 1.02 (-1.38, 1.53)  |
| 11    | -2.3 (-3.82, -1.2)   | -2.08 (-3.67, -0.48) | -0.52 (-1.7, 2.39)  | -2.17 (-3.76, -0.58) | -1.96 (-3.55, -0.36) | -0.75 (-2.02, 2.43) |
| 11A   | -2.42 (-2.63, -2.23) | -2.74 (-3.63, -2.1)  | -1.44 (-1.23, 0.35) | -1.61 (-1.82, -1.37) | -1.85 (-2.45, -1.22) | -2.44 (-0.89, 0.42) |
| 11D   | -2.64 (-4.11, -1.74) | -2.09 (-3.69, -0.5)  | 0.33 (-1.26, 2.67)  | -2.16 (-3.76, -0.58) | -1.96 (-3.57, -0.36) | 0.52 (-2.01, 2.45)  |
| 12A   | -2.3 (-3.81, -1.19)  | -1.7 (-2.82, -0.18)  | -0.63 (-0.98, 2.7)  | -2.17 (-3.76, -0.58) | -1.96 (-3.57, -0.37) | 0.22 (-2.02, 2.43)  |
| 12F   | -1.92 (-2.9, -0.93)  | -3.07 (-4.53, -2.23) | -2.22 (-2.89, 0.16) | -2.17 (-3.75, -0.59) | -2.28 (-2.99, -1.68) | -1.38 (-1.83, 1.57) |
| 13    | -2.1 (-2.59, -1.65)  | -3.13 (-4.6, -2.31)  | 0.61 (-2.54, -0.06) | -2.1 (-2.59, -1.59)  | -2.47 (-3.16, -1.92) | 1.53 (-1.23, 0.37)  |
| 15A   | -2.28 (-2.51, -2.06) | -2.61 (-3.51, -1.94) | 0.25 (-1.25, 0.38)  | -1.51 (-1.73, -1.27) | -2.87 (-4.33, -2.02) | 0.21 (-2.84, -0.48) |
| 15B/C | -2.52 (-2.76, -2.3)  | -2.67 (-4.18, -1.7)  | -1.7 (-1.66, 0.86)  | -1.98 (-2.21, -1.75) | -1.96 (-3.55, -0.36) | -2.02 (-1.58, 1.65) |
| 15F   | -2.9 (-4.35, -2.08)  | -2.09 (-3.67, -0.48) | 2.39 (-0.98, 2.95)  | -2.16 (-3.74, -0.57) | -1.96 (-3.56, -0.36) | 2.43 (-2.01, 2.42)  |
| 16F   | -3.41 (-4.25, -2.87) | -3.58 (-5.03, -2.81) | -0.32 (-1.7, 0.96)  | -2.83 (-3.7, -2.2)   | -2.8 (-3.36, -2.38)  | -0.25 (-0.82, 0.99) |
| 17F   | -2.33 (-2.55, -2.12) | -2.42 (-3.33, -1.67) | -1.23 (-1.03, 0.7)  | -1.85 (-2.09, -1.6)  | -1.96 (-3.55, -0.38) | -0.89 (-1.73, 1.49) |
| 18A   | -2.3 (-3.82, -1.19)  | -2.29 (-3.23, -1.46) | 0.35 (-1.45, 1.7)   | -1.78 (-2.88, -0.26) | -2.52 (-3.2, -1.98)  | 0.42 (-2.39, 0.49)  |
| 18B   | -1.92 (-2.91, -0.94) | -2.81 (-4.28, -1.89) | 0.6 (-2.64, 0.46)   | -2.17 (-3.76, -0.58) | -1.96 (-3.53, -0.36) | 0.21 (-2, 2.43)     |
| 19B   | -2.75 (-4.21, -1.88) | -2.08 (-3.67, -0.49) | -1.26 (-1.13, 2.8)  | -3.08 (-4.55, -2.24) | -1.96 (-3.54, -0.36) | -2.01 (-0.65, 3.27) |
| 20    | -2.75 (-4.21, -1.88) | -2.96 (-3.83, -2.36) | 0.65 (-1.44, 1.34)  | -2.55 (-4.07, -1.44) | -1.96 (-2.94, -0.97) | 0.21 (-0.88, 2.38)  |
| 21    | -2.35 (-2.86, -1.92) | -2.43 (-2.87, -2.03) | -0.98 (-0.69, 0.56) | -1.93 (-2.55, -1.2)  | -2.28 (-2.8, -1.81)  | -2.02 (-1.24, 0.44) |
| 22A   | -2.5 (-3.99, -1.54)  | -2.09 (-3.67, -0.48) | 2.7 (-1.43, 2.58)   | -2.75 (-4.24, -1.78) | -1.96 (-3.55, -0.35) | 2.43 (-1.05, 2.95)  |
| 22F   | -2.16 (-2.6, -1.76)  | -2.46 (-3.99, -1.34) | -1.18 (-1.87, 0.9)  | -1.83 (-2.57, -0.91) | -1.96 (-3.55, -0.36) | -0.13 (-1.94, 1.62) |
| 23A   | -3.17 (-3.81, -2.72) | -3.13 (-3.99, -2.55) | -2.89 (-0.92, 0.91) | -3.52 (-4.97, -2.75) | -3.45 (-4.9, -2.69)  | -1.83 (-1.55, 1.69) |
| 23B   | -2.76 (-3.43, -2.28) | -3.31 (-4.76, -2.52) | 0.16 (-2.07, 0.49)  | -2.17 (-3.15, -1.19) | -2.87 (-3.73, -2.28) | 1.57 (-1.99, 0.44)  |
| 24A   | -1.54 (-2.64, -0.02) | -2.46 (-3.99, -1.35) | -1.03 (-3.05, 0.65) | -2.17 (-3.76, -0.58) | -1.96 (-3.55, -0.37) | -0.38 (-2.02, 2.42) |
| 24B   | -2.5 (-4.01, -1.53)  | -2.29 (-3.23, -1.46) | -2.54 (-1.14, 1.91) | -2.55 (-4.06, -1.44) | -1.58 (-2.7, -0.07)  | -1.23 (-0.6, 3.08)  |
| 24F   | -2.83 (-4.28, -1.99) | -2.47 (-3.97, -1.35) | -0.06 (-1.36, 2.17) | -1.79 (-2.9, -0.28)  | -2.49 (-3.37, -1.81) | 0.37 (-2.43, 0.61)  |
| 27    | -2.3 (-3.83, -1.19)  | -2.08 (-3.69, -0.48) | -0.33 (-1.71, 2.4)  | -2.55 (-4.08, -1.45) | -1.96 (-3.54, -0.35) | -1.37 (-1.33, 2.78) |
| 28F   | -2.5 (-4, -1.53)     | -2.08 (-3.07, -1.1)  | -1.25 (-0.97, 2.19) | -1.44 (-2.34, 0.04)  | -2.4 (-3.31, -1.7)   | -2.84 (-2.68, 0.21) |
| 28A   | -2.3 (-3.81, -1.19)  | -2.08 (-3.67, -0.5)  | 0.38 (-1.71, 2.38)  | -2.17 (-3.75, -0.57) | -1.96 (-3.56, -0.37) | -0.48 (-2.02, 2.41) |
| 29    | -1.92 (-3.52, -0.33) | -2.09 (-3.67, -0.5)  | -0.15 (-2.41, 2.06) | -1.58 (-2.55, -0.1)  | -1.96 (-3.56, -0.36) | 0.02 (-2.53, 1.47)  |
| 31    | -2.38 (-3.06, -1.82) | -2.79 (-3.47, -2.27) | -1.66 (-1.29, 0.45) | -2.89 (-4.36, -1.98) | -2.6 (-3.28, -2.08)  | -1.58 (-0.84, 1.84) |
| 33A   | -2.12 (-3.06, -1.3)  | -2.48 (-3.18, -1.89) | 0.86 (-1.44, 0.75)  | -2.17 (-3.75, -0.56) | -2.34 (-3.85, -1.23) | 1.65 (-2.34, 1.73)  |

|     |                      |                      |                     |                      |                      |                     |
|-----|----------------------|----------------------|---------------------|----------------------|----------------------|---------------------|
| 33B | -2.26 (-3.17, -1.52) | -2.08 (-3.69, -0.49) | 0.86 (-1.57, 1.99)  | -1.72 (-2.42, -0.82) | -2.34 (-3.86, -1.22) | 0.21 (-2.37, 0.71)  |
| 33F | -2.12 (-3.06, -1.3)  | -2.46 (-4, -1.35)    | -0.98 (-2.06, 1.11) | -2.75 (-4.24, -1.79) | -2.2 (-2.92, -1.57)  | -2.01 (-0.66, 2.14) |
| 34  | -2.31 (-3.01, -1.74) | -2.54 (-3.24, -1.97) | 2.95 (-1.13, 0.68)  | -1.51 (-2.14, -0.62) | -2.42 (-2.93, -1.99) | 2.42 (-1.93, -0.14) |
| 35A | -1.33 (-2.29, 0.16)  | -2.47 (-3.99, -1.35) | -0.17 (-3.24, 0.36) | -2.16 (-3.75, -0.57) | -1.62 (-2.37, -0.71) | 0.02 (-1.2, 2.36)   |
| 35B | -2.26 (-2.45, -2.08) | -2.35 (-2.9, -1.87)  | -1.7 (-0.66, 0.43)  | -1.41 (-1.72, -1.04) | -1.72 (-2.35, -1)    | -0.82 (-1.04, 0.48) |
| 35C | -2.64 (-4.12, -1.74) | -2.47 (-3.97, -1.35) | 0.96 (-1.57, 2)     | -2.16 (-3.75, -0.56) | -1.96 (-3.54, -0.37) | 0.99 (-2.02, 2.42)  |
| 35F | -2.24 (-2.83, -1.73) | -2.08 (-3.69, -0.5)  | -0.09 (-1.54, 1.85) | -1.53 (-2.04, -0.86) | -1.95 (-3.54, -0.36) | -0.11 (-2.14, 1.23) |
| 37  | -1.6 (-2.11, -1)     | -2.08 (-3.68, -0.48) | -1.03 (-2.18, 1.19) | -1.34 (-2.2, 0.11)   | -1.96 (-3.56, -0.37) | -1.73 (-2.76, 1.17) |
| 38  | -2.52 (-3.19, -2)    | -2.61 (-3.51, -1.94) | 0.7 (-1.14, 0.86)   | -2.17 (-3.15, -1.18) | -1.96 (-2.94, -0.98) | 1.49 (-1.17, 1.6)   |
| 46  | -2.5 (-4, -1.53)     | -2.09 (-3.69, -0.49) | 0.02 (-1.45, 2.58)  | -2.17 (-3.77, -0.58) | -1.96 (-3.56, -0.37) | -0.76 (-2.02, 2.43) |
