# Supplementary material for: Pan-serotype Reduction in Progression of Streptococcus pneumoniae to Otitis Media After Rollout of Pneumococcal Conjugate Vaccines
Source: Oxford University Press journal article supplement (doi:10.1093/cid/cix673), 2017-07-28
Supplement: cix673_suppl_table_s7.pdf [file cix673_suppl_table_s7.pdf]

**Table S7: Association between change in otitis progression rate and phenotypic attributes.**

| Phenotypic attribute <sup>1</sup> | PCV7 or PCV13 serotypes |                          | Non-vaccine serotypes    |                          |
|-----------------------------------|-------------------------|--------------------------|--------------------------|--------------------------|
|                                   | <i>Ages 0-11 months</i> | <i>Ages 12-35 months</i> | <i>Ages 0-11 months</i>  | <i>Ages 12-35 months</i> |
| Resistance to neutrophil killing  | 0.75 (0.55, 1.10)       | 1.08 (0.78, 1.50)        | 0.78 (0.31, 1.91)        | 0.55 (0.20, 1.32)        |
| Strength of anionic charge        | 0.94 (0.68, 1.33)       | 1.13 (0.82, 1.57)        | 1.11 (0.88, 1.37)        | 1.08 (0.84, 1.38)        |
| Capsular size                     | 0.88 (0.63, 1.28)       | 1.19 (0.84, 1.62)        | 0.71 (0.36, 1.41)        | 0.62 (0.31, 1.17)        |
| IPD case-fatality ratio           | 0.81 (0.58, 1.16)       | 1.14 (0.80, 1.58)        | 0.95 (0.77, 1.18)        | 1.00 (0.79, 1.25)        |
| Metabolic efficiency              | 0.90 (0.67, 1.21)       | 1.03 (0.73, 1.45)        | 1.08 (0.84, 1.39)        | 1.07 (0.82, 1.40)        |
| Invasiveness                      | 0.54 (0.21, 1.53)       | 0.84 (0.33, 2.27)        | <b>0.77 (0.62, 0.94)</b> | 0.85 (0.68, 1.06)        |

<sup>1</sup>Phenotype characteristics and serotypes for which data were available are summarized in Tables 1 and S2.
